# Supplementary material for: Arbuscular mycorrhizal responsiveness of a Canary Island endemic (Artemisia thuscula Cav.): implications for nursery propagation and restoration
Source: Research Square preprint supplement (doi:10.21203/rs.3.rs-8056121/v1), 2025-11-13
Supplement: Supplementary file 1 [file 3b9ea601ca944687af4a2010.docx]

**Table S2** Chemical properties of nursery substrate for *Artemisia thuscula* Cav. seedlings.

| Parameter | Control | AM | Δ | %Δ | p value |
| --- | --- | --- | --- | --- | --- |
| pH (H2O) | 6.46 (6.32-6.59) | 6.07 (4.65-7.50) | -0.38 | -5.94 | 0.367 |
| pH (KCl) | 5.25 (5.24-5.27) | 5.25 (5.21-5.29) | 0.00 | -0.06 | 0.777 |
| Electrical conductivity (dS m-1) · 103 | 229 (202-255) | 237 (189-285) | 8 | 4 | 0.558 |
| SOC (%) | 7.30 (2.03-12.6) | 6.78 (5.86-7.69) | -0.53 | -7.20 | 0.712 |
| Total nitrogen (%) | 0.16 (0.10-0.21) | 0.16 (0.15-0.18) | 0.01 | 4.26 | 0.671 |
| Available phosphorous (mg kg⁻¹) | 22.0 (18.7-25.4) | 25.5 (16.3-34.7) | 3.5 | 15.9 | 0.239 |
| Exchangeable potassium (mEq kg⁻¹) | 9.87 (8.69-11.0) | 10.0 (8.86-11.2) | 0.2 | 1.7 | 0.688 |
| Exchangeable calcium (mEq kg⁻¹) | 156 (142-169) | 154 (144-163) | -2 | -1 | 0.635 |
| Exchangeable magnesium (mEq kg⁻¹) | 75 (48.5-102) | 71 (67-74) | -4 | -6 | 0.550 |
| Exchangeable sodium (mEq kg⁻¹) | 23.4 (20.4-26.5) | 24.5 (24.3-24.8) | 1.1 | 4.7 | 0.262 |

Values, mean (95% confidence interval, IC95%), n = 3 composite samples per treatment; AM, arbuscular mycorrhizal; Δ, mean difference; %Δ, relative difference; p value ≤ 0.050 (in bold) denotes significant differences between control and AM inoculated *Artemisia thuscula* Cav. seedlings; SOC, soil organic carbon.
