# Supplementary material for: Arbuscular mycorrhizal responsiveness of a Canary Island endemic (Artemisia thuscula Cav.): implications for nursery propagation and restoration
Source: Research Square preprint supplement (doi:10.21203/rs.3.rs-8056121/v1), 2025-11-13
Supplement: Supplementary file 2 [file 643282a8db500dc2441b71d5.docx]

**Table S3** Nursery leaf nutrient concentrations of *Artemisia thuscula* Cav. seedlings.

| Parameter | Control | AM | Δ | Δ (%) | p value |
| --- | --- | --- | --- | --- | --- |
| Nitrogen (g kg⁻¹) | 9.15 (7.60-10.7) | 10.8 (8.75-12.9) | 1.7 | 18.2 | 0.054 |
| Phosphorous (g kg⁻¹) | 2.50 (2.03-2.97) | 2.46 (2.05-2.87) | -0.04 | -1.73 | 0.781 |
| Potassium (g kg⁻¹) | 17.7 (14.5-20.9) | 22.1 (17.8-26.5) | 4.4 | 24.8 | **0.028** |
| Calcium (g kg⁻¹) | 7.80 (7.14-8.46) | 8.30 (5.93-10.7) | 0.50 | 6.41 | 0.463 |
| Magnesium (g kg⁻¹) | 2.37 (0.46-4.28) | 1.98 (1.41-2.56) | -0.38 | -16.2 | 0.483 |
| Sodium (g kg⁻¹) | 5.02 (4.08-5.95) | 5.80 (5.35-6.25) | 0.78 | 15.6 | **0.050** |
| Iron (mg kg⁻¹) | 112 (109-116) | 124 (36.2-212) | 12 | 10.4 | 0.625 |
| Manganese (mg kg⁻¹) | 158 (105-211) | 222 (139-306) | 64 | 40.7 | 0.059 |
| Zinc (mg kg⁻¹) | 15.3 (13.9-16.8) | 18.0 (18.0-18.0) | 2.7 | 17.4 | **0.015** |
| Copper (mg kg⁻¹) | 13.0 (10.5-15.5) | 12.7 (11.2-14.1) | -0.3 | -2.56 | 0.649 |

Values, mean (95% confidence interval, IC95%), n = 3 composite samples per treatment; AM, arbuscular mycorrhizal; Δ, mean difference; %Δ, relative difference; p value ≤ 0.050 (in bold) denotes significant differences between control and AM inoculated *Artemisia thuscula* Cav. seedlings.
