# Supplementary material for: Arbuscular mycorrhizal responsiveness of a Canary Island endemic (Artemisia thuscula Cav.): implications for nursery propagation and restoration
Source: Research Square preprint supplement (doi:10.21203/rs.3.rs-8056121/v1), 2025-11-13
Supplement: Supplementary file 3 [file 8c0c759b7dbe09edc4b4a05a.docx]

# Table S1 Field leaf nutrient concentrations of *Artemisia* species of the Canary Islands.

| Parameter | *A. thuscula* Cav. | *A. thuscula* Cav. | *A. ramosa* C. Sm. ex Link | *A. reptans* C. Sm. |
| --- | --- | --- | --- | --- |
| Island slope | southern | northern | southern | southern |
| Altitude (m a.s.l.) | 770 | 423 | 30 | 15 |
| Nitrogen (g kg⁻¹) | 15.7 (7.96-23.3) | 10.6 (9.60-11.6) | 13.8 (9.16-18.5) | 8.38 (6.61-10.2) |
| Phosphorous (g kg⁻¹) | 2.33 (1.35-3.31) | 2.81 (1.02-4.60) | 1.84 (0.97-2.71) | 1.80 (0.81-2.79) |
| Potassium (g kg⁻¹) | 23.6 (19.7-27.5) | 16.3 (3.61-29.1) | 12.6 (10.3-14.9) | 8.03 (6.29-9.78) |
| Calcium (g kg⁻¹) | 8.73 (1.87-15.6) | 6.10 (5.35-6.85) | 5.47 (-0.06-11.0) | 10.9 (7.45-14.4) |
| Magnesium (g kg⁻¹) | 2.14 (1.48-2.80) | 2.39 (1.59-3.18) | 2.73 (1.79-3.67) | 5.47 (2.89-8.05) |
| Sodium (g kg⁻¹) | 2.45 (1.82-3.07) | 5.40 (2.22-8.58) | 8.05 (4.82-11.3) | 17.4 (16.6-18.2) |
| Iron (mg kg⁻¹) | 120 (104-137) | 1,325 (999-1,651) | 487 (271-703) | 776 (236-1,316) |
| Manganese (mg kg⁻¹) | 141 (57-225) | 195 (173-217) | 65 (39.8-91) | 76 (74.5-77.8) |
| Zinc (mg kg⁻¹) | 80 (16.2-144) | 50 (-2.04-101) | 29.7 (13.1-46.2) | 60 (4.94-114) |
| Copper (mg kg⁻¹) | 13.8 (6.99-20.7) | 25.8 (20.2-31.4) | 15.2 (13.3-17.1) | 19.3 (16.5-22.2) |

Values, mean (95% confidence interval, IC95%), n = 3 per site.
